# Supplementary material for: EZH2 inhibition decreases neuroblastoma proliferation and in vivo tumor growth
Source: PubMed Central journal article supplement (PMC7942994; doi:10.1371/journal.pone.0246244), 2021-03-09
Supplement: pone.0246244.s004.pdf [file pone.0246244.s004.pdf]

...ENMI-HBC

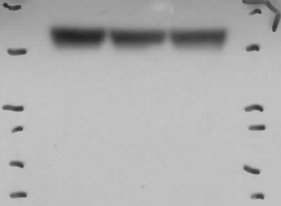

COA 60,3,5 GSK 50 mg <sup>active</sup> 7





actin

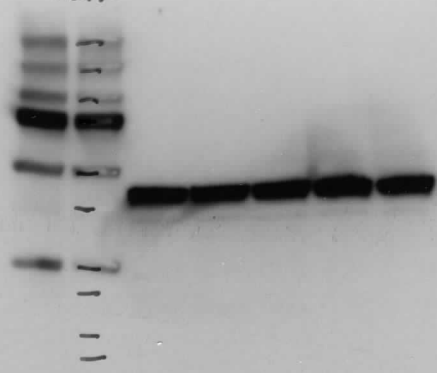

0 5 10 15 20

03021B SREP 454343

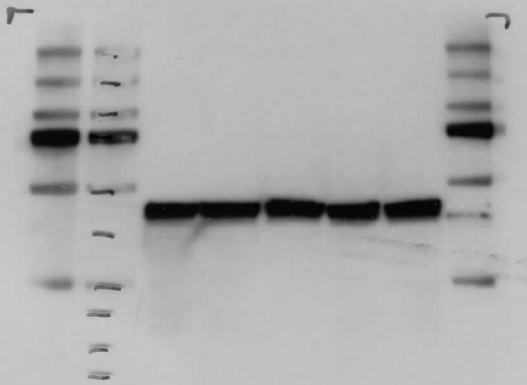

0 5 10 15 20

LO30248 WAC hSK343  
altik.

5

1  
1  
1  
1  
1  
1  
1  
1  
1  
1  
1  
1  
1

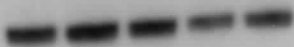

LO30218 AS 0 5 10 15 20  
GSKJ43 R242



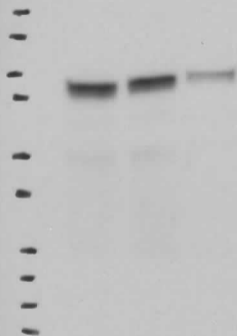

CO42319 COA305, 10 GSK343 50mg

1:1000 E442



250

1 1 1

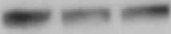

0

3

15

1 1 1  
1 1 1  
1 1 1

CONG

65K

E2K2

L

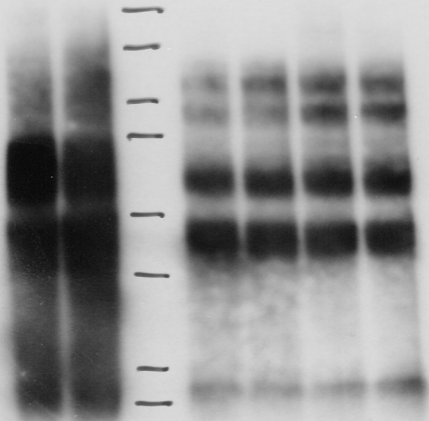

042018 EZH2-FAK COIP

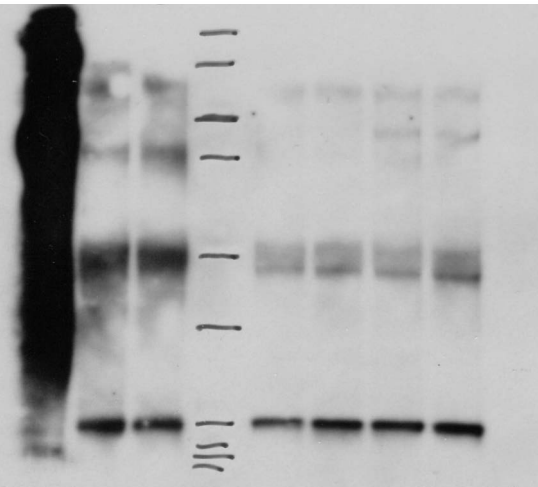

(+) (-) (-)

AS BE SHIP WAL

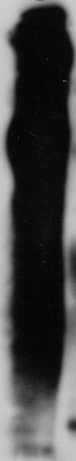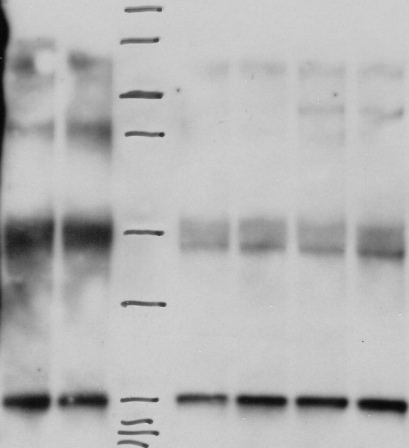

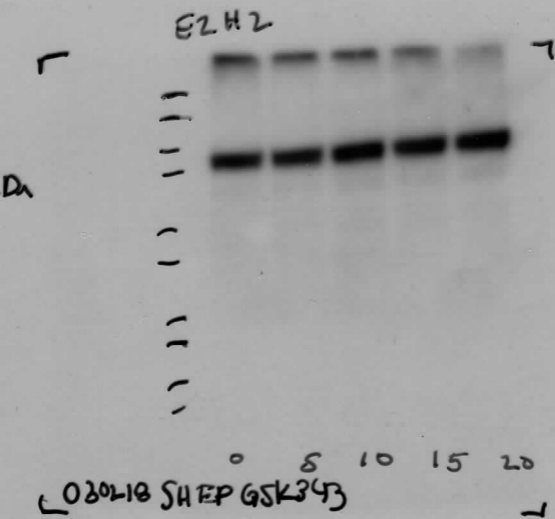

EM2

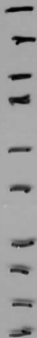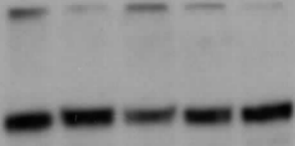

0 5 10 15 20

L030218 WAC GSK343

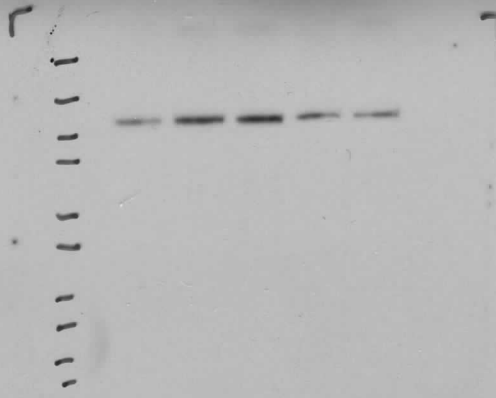

L030218 DS 0 5 10 15 20  
 GSK3 $\beta$  FAK

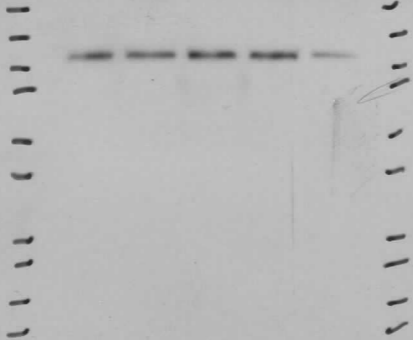

030218 BE GSK3<sup>5</sup>4<sup>10</sup>B<sup>15</sup> 20  
FRK



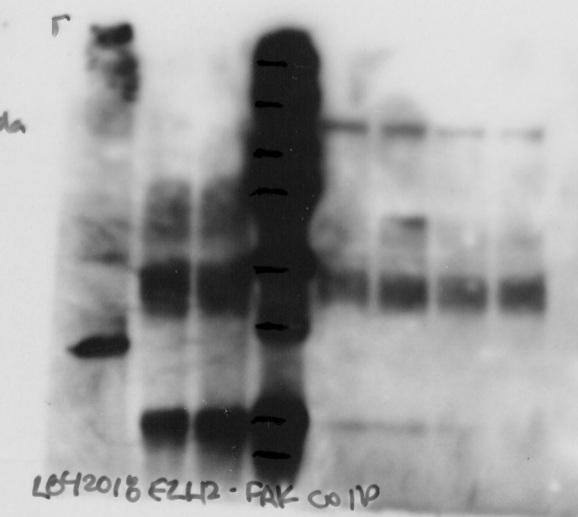

LBH2018 E2L12 - FAK Co IP

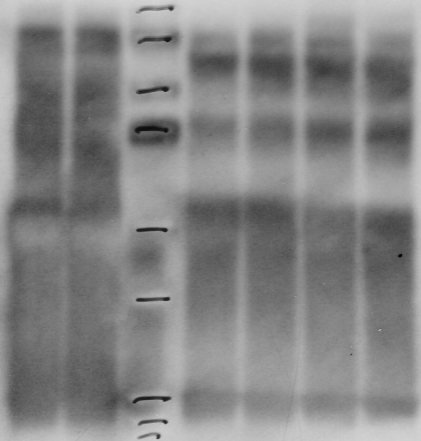

APPV  
1:1000  
classical

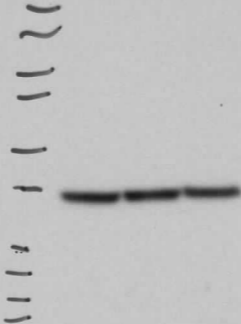

LQ4819 WA 30, 5, 10

37

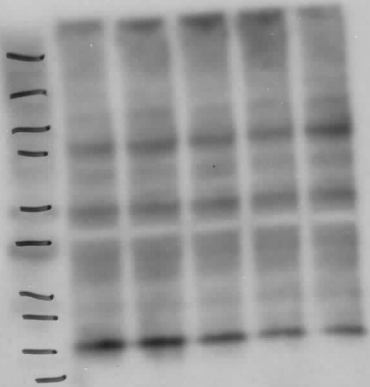

0 5 10 15 20

L0302P8 AS GSK H3

1000000

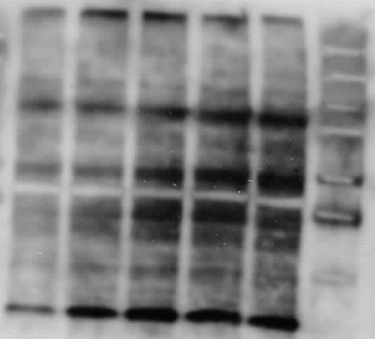

0 5 10 15 20

LE302-10

BE GSK

1+3

1

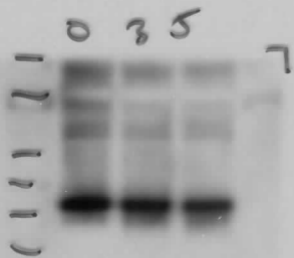

COX6

GSK ←

H3

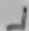

0 5 10

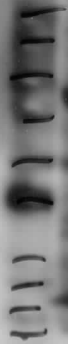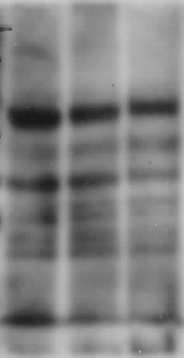

042319<sup>5</sup> CA3 GSK #3

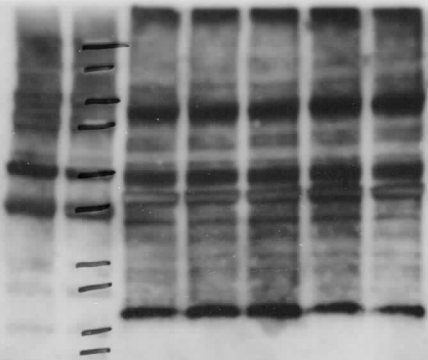

030218 SHEP 0 5 10 15 20  
GSK #3



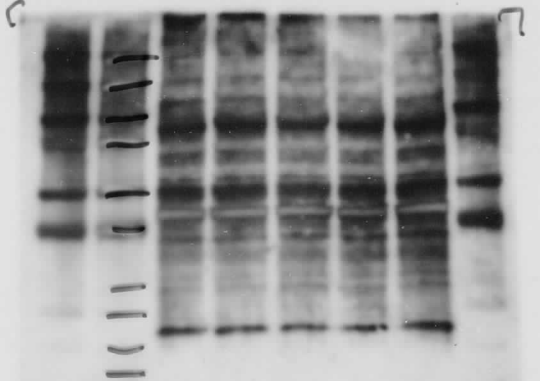

030218 0.5 10 15 20  
WAC GSK H3

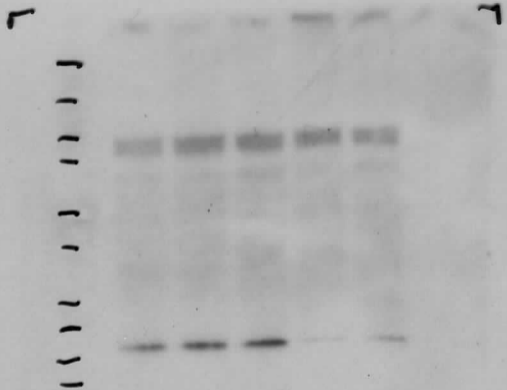

LD3021BAS 0 5 10 15 20 H3K  
L5K343

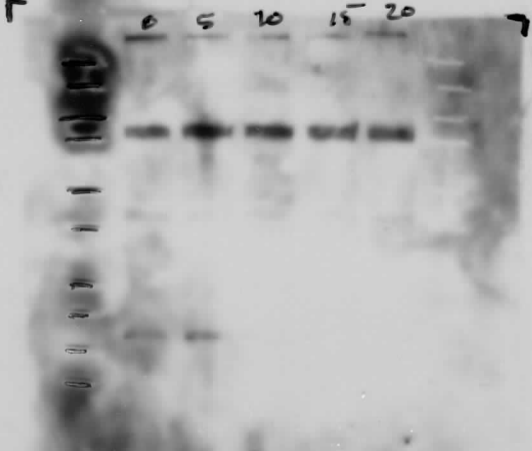

6 080218 BE GSK-3 $\beta$  13  
 0 5 10 15 20 H3IC

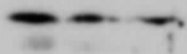

1:1000

H3K27me3

042319 CoA3 0,5, 10GSKJH3 50ng

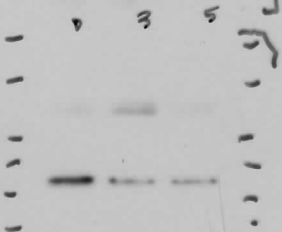

AT3K

(0.46 0,3,5 65K 50µg)

H3K27me

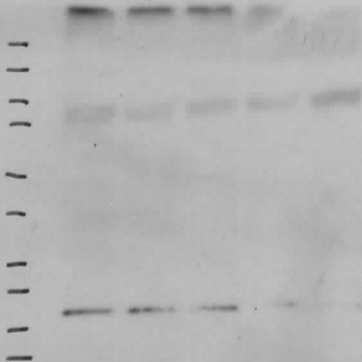

0 5 10 15 20

L 030218 STEP GSK3413

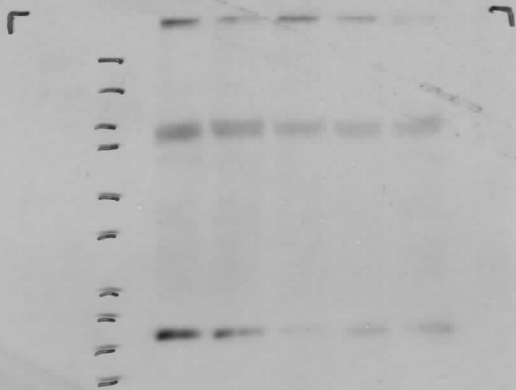

0 5 10 15 20

030218 WAC GR343  
H3K27me

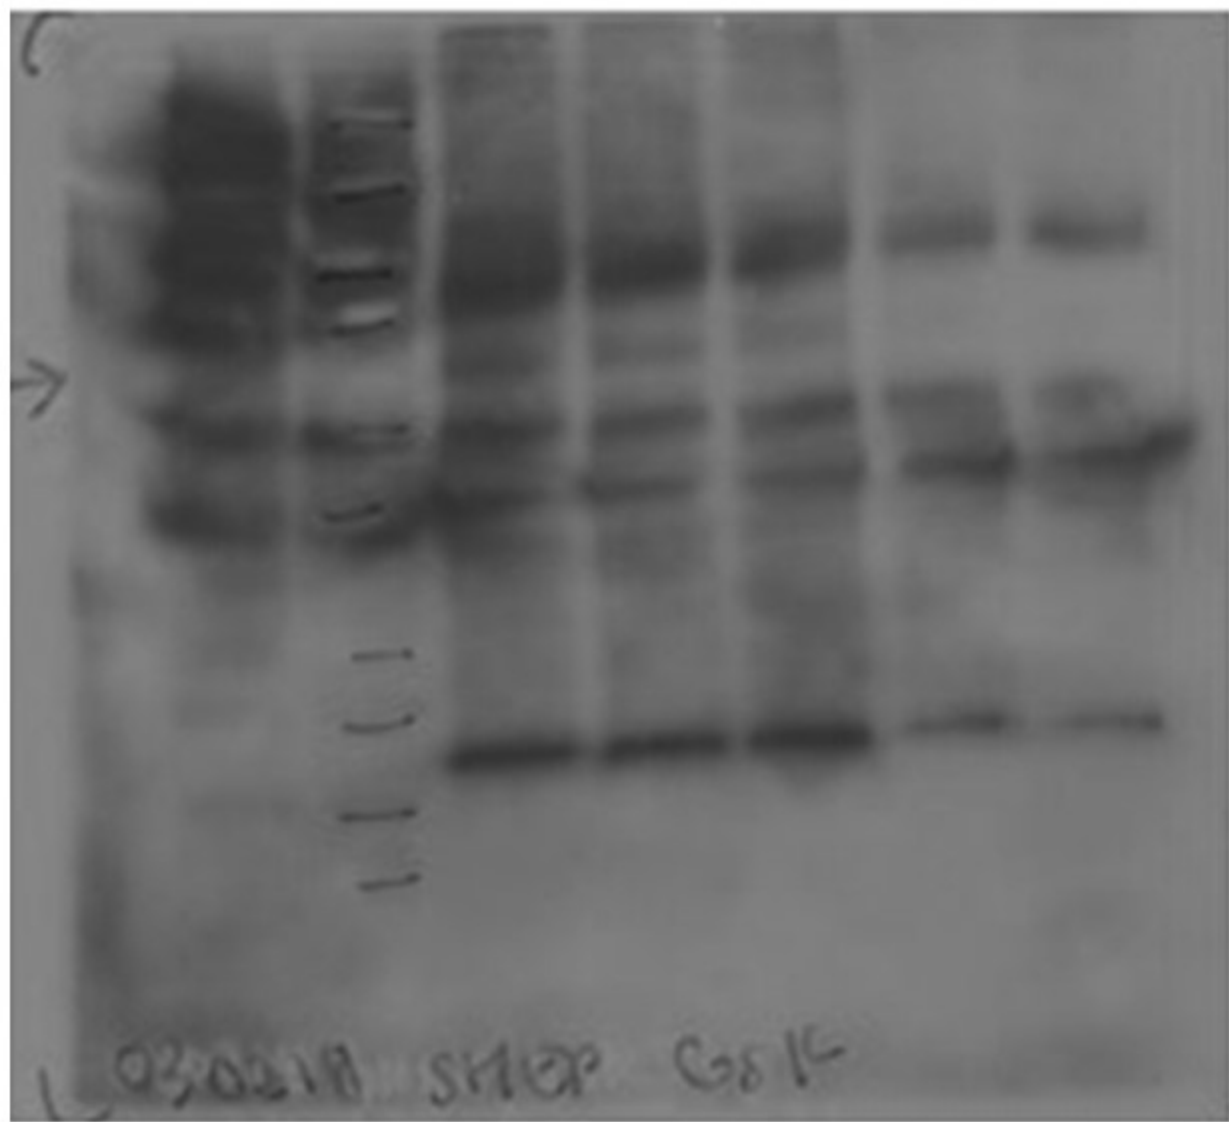



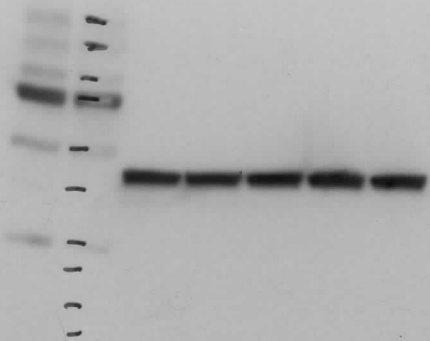

L 030218 SHED 0 5 10 16 20  
GSK343

E2M2  
1:1000  
class 12

~ IgG

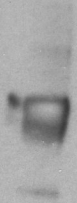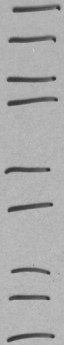

AS BE

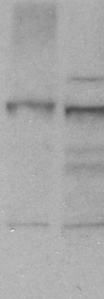

AS BE  
FAK FAK

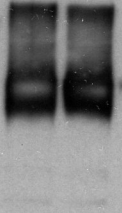

~ 122920 AS BE IP FAK ~

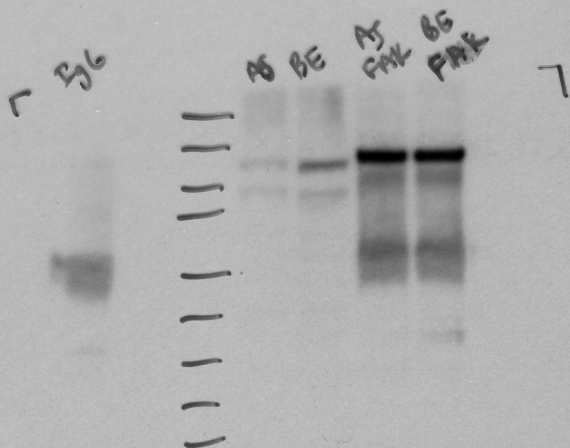

FAK  
1:1000  
Classic

122920 AS BE IP FAK

FAK  
1:1500  
cloud 200

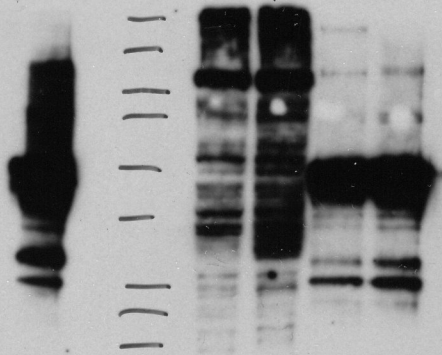

122920 AS.BEIR P4H2

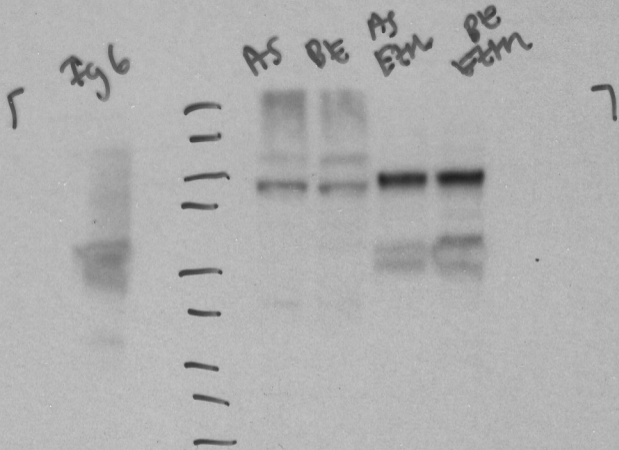

L22920 AS BE DQ E2M
